# Supplementary material for: Assessment of Different Circulating Tumor Cell Platforms for Uveal Melanoma: Potential Impact for Future Routine Clinical Practice
Source: MDPI journal article supplement (doi:10.3390/ijms241311075), 2023-07-04
Supplement: s1 [file s1]

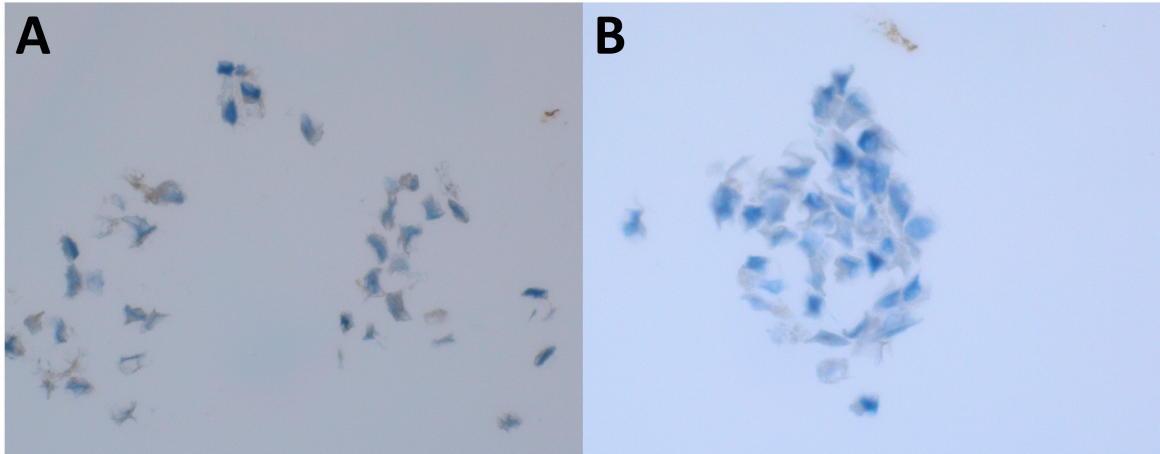

Supplementary Figure S1. expression in melanoma cell lines: A: M229 cell line. B: OMM 2.3 cell line. (immuno-peroxidase; clone MUC18/1130, ab233923, Abcam Plc, UK; original magnification x400).
